1 **July 28, 2019**

2 **Termite mounds contain distinct methanotroph**  
3 **communities that are kinetically adapted to elevated**  
4 **methane concentrations**

5 Eleonora Chiri<sup>1,2</sup> #, Chris Greening<sup>2</sup> \*, Stefan K. Arndt<sup>1</sup> \*, Philipp A. Nauer<sup>1,3</sup> #

6

7 <sup>1</sup> School of Ecosystem and Forest Sciences, University of Melbourne, Richmond, VIC  
8 3121, Australia

9 <sup>2</sup> School of Biological Sciences, Monash University, Clayton, VIC 3800, Australia

10 <sup>3</sup> School of Chemistry, Monash University, Clayton VIC 3800, Australia

11

12 # These authors contributed equally to this work.

13

14 \* Correspondence can be addressed to:

15

16 Prof Stefan Arndt (sarndt@unimelb.edu.au), School of Ecosystem and Forest Sciences,  
17 University of Melbourne, Richmond, VIC 3121, Australia

18 A/Prof Chris Greening (chris.greening@monash.edu), School of Biological Sciences,  
19 Monash University, Clayton, VIC 3800, Australia

## 20 **Abstract**

21 Termite mounds have recently been confirmed to mitigate approximately half of termite  
22 methane (CH<sub>4</sub>) emissions, but the aerobic methane-oxidizing bacteria (methanotrophs)  
23 responsible for this consumption have not been resolved. Here we describe the  
24 abundance, composition, and kinetics of the methanotroph communities in the mounds  
25 of three distinct termite species. We show that methanotrophs are rare members of the  
26 termite mound biosphere and have a comparable abundance, but distinct composition, to  
27 those of adjoining soil samples. Across all mounds, the most abundant and prevalent  
28 particulate methane monooxygenase sequences detected were affiliated with Upland Soil  
29 Cluster  $\alpha$  (USC $\alpha$ ), with sequences homologous to *Methylocystis* and Tropical Upland Soil  
30 Cluster also detected. The Michaelis-Menten kinetics of CH<sub>4</sub> oxidation in mounds were  
31 estimated from *in situ* reaction rates. The apparent CH<sub>4</sub> affinities of the communities were  
32 in the low micromolar range, which is one to two orders of magnitude higher than those  
33 of upland soils, but significantly lower than those measured in soils with a large CH<sub>4</sub>  
34 source such as landfill-cover soils. The rate constant of CH<sub>4</sub> oxidation, as well as the  
35 porosity of the mound material, were significantly positively correlated with the abundance  
36 of methanotroph communities of termite mounds. We conclude that termite-derived CH<sub>4</sub>  
37 emissions have selected for unique methanotroph communities that are kinetically  
38 adapted to elevated CH<sub>4</sub> concentrations. However, factors other than substrate  
39 concentration appear to limit methanotroph abundance and hence these bacteria only  
40 partially mitigate termite-derived CH<sub>4</sub> emissions. Our results also highlight the  
41 predominant role of USC $\alpha$  in an environment with elevated CH<sub>4</sub> concentrations and  
42 suggest a higher functional diversity within this group than previously recognised.

43

## 44 Introduction

45 Termites are mound-building eusocial insects that live in colonies throughout the tropics  
46 and subtropics. These organisms completely degrade lignocellulose in a process  
47 primarily mediated by anaerobic symbiotic microorganisms in their hindgut [1]. During this  
48 process, hydrogenotrophic methanogens produce substantial amounts of methane (CH<sub>4</sub>)  
49 that is emitted from the termite into the atmosphere [2–4]. Production rates vary by three  
50 to four orders of magnitude depending on the termite species and their dietary  
51 preferences (i.e. wood-, grass-, soil- or fungus-feeding) [1, 4, 5]. Current models suggest  
52 that termites are responsible for between 1 to 3 % of global CH<sub>4</sub> emissions to the  
53 atmosphere [6].

54 Aerobic methane-oxidizing bacteria (methanotrophs) significantly mitigate emissions of  
55 CH<sub>4</sub> from termites [7]. Methanotrophs gain carbon and energy by oxidising CH<sub>4</sub> to carbon  
56 dioxide, with the first step in this reaction being catalysed by particulate and soluble  
57 methane-monooxygenases [8]. It is controversial whether termite hindguts harbor such  
58 organisms; while *Methylocystis* spp. were recently isolated from termites [9], other studies  
59 could not detect methanotroph functional gene markers or measurable amounts of <sup>14</sup>CO<sub>2</sub>  
60 during <sup>14</sup>CH<sub>4</sub> incubation experiments [10]. We also observed that the addition of inhibitors  
61 of CH<sub>4</sub> oxidation did not increase direct termite CH<sub>4</sub> emissions [7]. However, many termite  
62 colonies construct large mounds built from soil material or build their nest in soil, which is  
63 generally a sink for atmospheric CH<sub>4</sub> [11]. While results from incubation experiments of  
64 mound material were conflicting [12–14], we recently presented clear evidence of  
65 widespread CH<sub>4</sub> oxidation in North Australian termite mounds [7]: results from three  
66 different *in situ* methods to measure CH<sub>4</sub> oxidation in mounds confirmed that  
67 methanotrophs mitigate between 20 to 80 % of termite-derived CH<sub>4</sub> before emission to  
68 the atmosphere. However, the community composition and kinetic behaviour of the  
69 methanotrophs responsible remain largely unknown.

70 Compared to soils, methanotrophs inhabiting termite mounds have received little  
71 attention. Ho et al. [14] investigated mound material of the African fungus-feeding termite  
72 *Macrotermes falciger* using a *pmoA*-based diagnostic microarray approach. Community  
73 composition differed between mound and soil, and at some locations within the large

74 compartmentalised mounds. Slurry incubations confirmed potential CH<sub>4</sub> oxidation at high  
75 and low CH<sub>4</sub> concentrations. The mound community was reportedly dominated by  
76 gammaproteobacterial methanotrophs of the JR3 cluster, while the functional gene of the  
77 soluble methane-monooxygenase could not be detected, nor could methanotrophs of the  
78 Verrucomicrobia and Methyloirradiata (NC10) phyla. Beside this pioneering work, the  
79 mound methanotroph communities of no other termite species has been investigated.  
80 However, large differences might exist between termite species and particularly their  
81 dietary preferences, as well as the mounds' impressive variety of sizes, shapes and  
82 internal structures [15, 16]. Reflecting this, *in situ* studies have shown that there is a large  
83 variation in methanotroph activity in mounds both within and between species; for  
84 example, *Tumulitermes pastinator* mounds appear to be largely inactive and still a high  
85 fraction of termite-derived CH<sub>4</sub> can be oxidised in soil beneath mounds, due to facilitation  
86 of CH<sub>4</sub> transport within the mound [7]. It remains unclear whether differences in  
87 methanotroph community abundance or composition account for these activity  
88 differences.

89 In this work, we aimed to resolve these discrepancies by conducting a comprehensive  
90 analysis of the composition and kinetics of the methanotroph communities within termite  
91 mounds of Australian termite species. Three mound-building termite species were  
92 selected, the wood-feeding *Microcerotermes nervosus* (Mn), soil-interface-feeding  
93 *Macrognathotermes sunteri* (Ms), and grass-feeding *Tumulitermes pastinator* (Tp), which  
94 represent the three main feeding groups present in Australia [17]. Mounds of these  
95 species were previously confirmed to oxidise a high fraction of termite-produced CH<sub>4</sub> [7].  
96 We used the *pmoA* gene, encoding a subunit of the particulate methane monooxygenase  
97 present in most methanotrophs [18], as a molecular marker to study the abundance,  
98 diversity, and composition of the methanotrophs within 17 mounds and a subset of  
99 adjoining soils. In parallel, we performed *in situ* studies using gas push-pull tests (GPPTs)  
100 to derive the kinetic parameters of CH<sub>4</sub> oxidation. We demonstrate that methanotrophic  
101 communities in the core and periphery of termite mounds are compositionally and  
102 kinetically distinct from those of surrounding soil, and primarily comprise methanotrophs  
103 affiliated with the Upland Soil Cluster  $\alpha$  (USC $\alpha$ ) with an apparent medium affinity for CH<sub>4</sub>.

## 104 **Materials and Methods**

### 105 **Field sites and sampling**

106 Field tests and sampling were performed in April and May 2016 in a coastal savanna  
107 woodland on the campus of Charles Darwin University in Darwin, Northern Territory,  
108 Australia (12.370° S, 130.867° E). The site is described in detail in Nauer et al. [7]. For  
109 this study, 29 mounds were first subject to *in situ* methane kinetic measurements using  
110 gas push-pull tests (described below). For further investigations following field  
111 measurements, we selected 17 termite mounds of an appropriate size for processing in  
112 the laboratory (initially 18, but one was damaged during transport and had to be  
113 discarded). These mounds were first excavated but kept intact to measure internal  
114 structure, volume, densities, and porosities as previously described [19]. They were then  
115 deconstructed to (i) sample termites for species identification, (ii) collect mound material  
116 for gravimetric water content measurements, and (iii) collect mound material for molecular  
117 analyses of methanotrophic community. For species determination, soldiers were  
118 individually picked and stored in pure ethanol for species confirmation as previously  
119 described [19]. For gravimetric water content measurements, approximately 200 g of  
120 mound material from both core and periphery locations were subsampled and oven dried  
121 at 105 °C for >72 hours; subsamples were measured before and after drying and the  
122 water content calculated based on mass loss. Subsamples for physicochemical  
123 parameters were oven-dried at 60 °C for 72 h, carefully homogenised into a composite  
124 sample for each termite species and location, and sent to an external laboratory for  
125 analyses according to standard protocols (CSBP laboratories, Bibra Lake WA, Australia).  
126 For community analysis, mound and soil material was collected under sterile conditions  
127 using bleach- and heat-sterilised spatulas, and immediately stored in autoclaved 2 mL  
128 centrifuge tubes at -20 °C. For each sampling location (mound core and periphery, soil  
129 beneath and surrounding the mound), we collected triplicates of pooled materials deriving  
130 from three different spots. Mound cores were sampled from within 20 to 30 cm from the  
131 approximate centroid of mound, whereas mound periphery was collected from the outer  
132 5 to 10 cm of the mound. For a subset of the investigated mounds, soil was collected from

133 beneath the mound immediately after mound excavation, and from the surrounding soil  
134 within a 1-2 m radius from the mound.

### 135 **Genomic DNA isolation and *pmoA* gene amplification**

136 Each individual sample of mound material and soil was homogenised. DNA was extracted  
137 from 0.25 to 0.5 grams of each sample using the PowerLyzer PowerSoil DNA Isolation  
138 Kit (Qiagen, US), according to the manufacturer instructions. The purity and integrity of  
139 the DNA extracts was verified by spectrophotometry (NanoDrop ND-1000  
140 spectrophotometer, Nanodrop Technologies Inc., US) and PCR amplification of 16S  
141 rRNA genes. Good yields of high-quality, amplifiable genomic DNA were obtained from  
142 all 48 samples. Amplicons of the *pmoA* gene were also obtained from all samples using  
143 previously described degenerate primers (A189f 5'-GGNGACTGGGACTTCTGG-3', and  
144 mb661 5'-CCGGMGCAACGTCYTTACC-3') [20, 21] and cycling conditions [22].  
145 Amplification reaction mixtures (25-50  $\mu$ L final volume) were prepared using 1  $\mu$ L of DNA  
146 extract as template, 1  $\times$  PCR buffer, 0.2 mM of each primer, 0.25 mM deoxynucleoside  
147 triphosphates (dNTPs), and 0.025 U  $\mu$ L<sup>-1</sup> of Taq polymerase (Takara Biotechnology Ltd.,  
148 Japan). Different dilutions (undiluted to 1:100 in PCR-grade water) of DNA extracts were  
149 used as template during amplification, and the dilution resulting in the highest yield and  
150 quality of PCR product was used for further analyses.

### 151 **Quantitative PCR assays**

152 Quantitative PCR assays were used used to estimate the abundance of the total bacterial  
153 community and methanotroph community. Total bacterial abundance was estimated by  
154 amplifying the 16S rRNA gene using degenerate primers (515FB 5'-  
155 GTGYCAGCMGCCGCGGTAA-3' and 806RB 5'-GGACTACNVGGGTWTCTAAT-3') and  
156 cycling conditions as previously described [23–25]. Methanotroph abundance was  
157 estimated by amplifying the *pmoA* gene using previously described degenerate primers  
158 (A189f 5'-GGNGACTGGGACTTCTGG-3', and mb661 5'-CCGGMGCAACGTCYTTACC-  
159 3') [20, 21] and cycling conditions [22]. Gene copy numbers were determined using a  
160 LightCycler 480 real-time PCR system (Roche, Basel, CH). Individual reactions contained  
161 1  $\times$  PowerUp SYBR Green Master Mix (Thermo Fisher Scientific), 400  $\mu$ M of each primer,

162 and 1  $\mu$ l of diluted environmental DNA mixed to a final volume of 20  $\mu$ l. Thermal profiles  
163 were adapted from those used for previous PCRs and included an acquisition step of 85  
164  $^{\circ}$ C for 30 s at the end of each amplification cycle. Melting curve analysis was performed  
165 as follows: 95  $^{\circ}$ C for 15 s, 60  $^{\circ}$ C for 60 s, 95  $^{\circ}$ C for 30 s, 60  $^{\circ}$ C for 15 s. For each assay  
166 (96-well plate), duplicate serial dilutions of quantified DNA extract from *Methylosinus*  
167 *trichosporium* were used for calibration curves to quantify 16 rRNA genes or *pmoA* genes.  
168 Each sample was analyzed in triplicate, and a total of three assays were required for each  
169 gene to include all the samples. Amplification efficiencies calculated from the slopes of  
170 calibration curves were  $>70\%$  and  $R^2$  values were  $>0.98$ .

### 171 **Methanotroph community analysis**

172 The structure of the methanotroph community within each sample was inferred from  
173 amplicon sequencing of community *pmoA* genes. DNA extracts of all samples were sent  
174 to the Australian Genome Research Facility (AGRF; Brisbane, QLD) for preparation of  
175 *pmoA* gene amplicon libraries using the above primer sets (A189f and mb661) and  
176 thermal conditions. Subsequent amplicon sequencing was performed on a MiSeq DNA-  
177 sequencing platform using a 600-cycle MiSeq Reagent Kit v3 (Illumina, San Diego, CA).  
178 Sequencing yielded 5,594,739 paired end sequences, of which 3,078,335 passed quality  
179 checks and data processing, and were used for subsequent analyses. Sequence read-  
180 counts spanned three orders of magnitude ( $10^5$  to  $10^2$ ), with 54% of the samples  
181 exhibiting read counts above the average read-count value ( $>65K$ ) and most mound  
182 periphery samples having read-counts below 10K. Six samples with read-counts below  
183 1K and were excluded from subsequent analyses. Sequencing data was processed  
184 according to our previously published pipeline [26], with minor modifications. Briefly,  
185 reads were 3'-trimmed to remove ambiguous or low-quality endings, then merged and  
186 primer-site trimmed. Quality filters included an amplicon-size selection (471 nt) and the  
187 removal of amplicons containing stop codons (e.g., TAA, TAG, TGA). Sequences were  
188 also checked for correct open reading frames (ORF) using the FrameBot tool  
189 (<http://fungene.cme.msu.edu/FunGenePipeline/framebot/form.spr>). The centroid  
190 clustering method [27] identified 25 Operational Taxonomic Units (OTUs) that shared  
191 86% nucleotide sequence similarity [28] with sequences from a curated *pmoA* gene

192 database derived from Dumont et al., 2014 [29]. Phylogenetic distances of the assigned  
193 OTUs in relation to reference *pmoA* sequences were assessed as previously described  
194 [26]. The phylogenetic tree of protein-derived *pmoA* sequences was constructed using  
195 the maximum-likelihood method and the LG empirical amino acid substitution model,  
196 which showed the lowest Akaike information criterion (AIC) during substitution model  
197 testing, and was bootstrapped using 100 bootstrap replicates. All sequences affiliated  
198 with methanotrophs and no *pxmA* or *amoA* sequences were detected.

### 199 **Phylogenetic and diversity analyses**

200 Alpha and beta diversity calculations, as well as read count normalization of the *pmoA*  
201 sequences, were performed with the package phyloseq v1.12.2 [30] from the open source  
202 software Bioconductor. To account for differences in numbers of reads between samples,  
203 we rarefied OTU counts to an even sampling depth of 1,611 read counts. Chao1,  
204 Shannon, and Inverse Simpson indices were computed to assess the alpha diversity of  
205 MOB communities. Beta diversity of methanotroph communities was measured using the  
206 phylogenetic metric Unifrac weighted by the relative abundance of individual OTUs  
207 (Lozupone and Knight, 2005). Differences were visualised using non-parametric multi-  
208 dimensional scaling ordinations (nMDS). To determine whether the observed between-  
209 group distances were statistically significant, we performed permutational multivariate  
210 analysis of variance (PERMANOVA) with the software PRIMER-E v7 (PRIMER-E Ltd.,  
211 Plymouth, United Kingdom). Negative binomial models were performed on the non-  
212 rarefied OTU dataset to assess the differential abundance of bacterial OTUs between  
213 sample groups, and the false discovery rate approach was used to account for multiple  
214 testing.

### 215 **Gas push-pull tests**

216 The gas push-pull test was used to estimate *in situ* activity coefficients as described  
217 previously [19, 31]. Michaelis-Menten parameters estimated from *in situ* methods are  
218 integrated measures across a large mass of substrate and are thus better suited to  
219 characterise the kinetic potential of whole microbial communities in heterogeneous  
220 systems than laboratory microcosms, which suffer from inevitable sampling bias [32]. In



221 brief, a gas mixture containing laboratory air,  $\sim 900 \mu\text{L L}^{-1}$  of  $\text{CH}_4$ , and  $\sim 0.1 \text{ L L}^{-1}$  argon  
222 (Ar) was injected at a rate of  $\sim 0.5 \text{ L min}^{-1}$  into the lower center of the termite mounds and  
223 then immediately extracted from the same location at the same flow rate. During  
224 extraction, the injected gas mixture was gradually diluted with termite-mound air down to  
225 background levels; the tracer Ar accounted for this dilution due to its similar transport  
226 behavior to  $\text{CH}_4$ . A timeseries of  $\text{CH}_4$  and Ar concentrations was collected during the 24  
227 min injection phase, and the 36 min extraction phase. Concentrations of  $\text{CH}_4$  were  
228 measured quasi-continuously (frequency of 1 Hz) using a field-portable spectrometer  
229 (Fast Greenhouse Gas Analyser Los Gatos Research, Mountain View, CA). For Ar,  
230 discrete samples were collected at fixed intervals during injection ( $n = 3$ ) and extraction  
231 ( $n = 10-12$ ), as well as prior to injection to determine background levels. Argon  
232 concentrations were analysed on a customised gas chromatography system (SRI 8610,  
233 SRI Instruments, Torrance, CA) with an external thermal conductivity detector (TCD; VICI  
234 Valco Instruments Co., Houston, TX). To improve separation of Ar, oxygen was removed  
235 from the sample-gas stream prior to separation with a manually packed Pd-Al catalyst  
236 column [19, 33].

### 237 **Kinetic analysis**

238 First-order rate coefficients of  $\text{CH}_4$  oxidation (activity coefficient  $k$ ) were estimated from  
239 GPPTs via the slope of the logarithm of relative  $\text{CH}_4$  vs Ar concentrations, plotted against  
240 a transformed reaction time, according to the plug-flow reactor model for simplified GPPT  
241 analysis [34]. This data also allowed the calculation of reaction rates at different  $\text{CH}_4$   
242 concentrations from segments of the extraction time-series, and thus the estimation of  
243 Michaelis-Menten parameters [35]. The running average of  $\text{CH}_4$  concentrations  $C_{\text{CH}_4}$  over  
244 three consecutive extraction samples was multiplied with the corresponding activity ( $k$ )  
245 from the logarithmic plot to calculate an individual reaction rate  $R_{\text{ox}}$  for each segment. The  
246 Michaelis-Menten parameters  $K_m$  and  $V_{\text{max}}$  were then estimated for each individual GPPT,  
247 and for all combined pairs of concentrations and reaction rates, by fitting the Michaelis-  
248 Menten model  $R_{\text{ox}} = V_{\text{max}} * C_{\text{CH}_4} / (K_m + C_{\text{CH}_4})$  to the data using the non-linear regression  
249 routine `nls()` in R [36]. The AIC was calculated and compared with a linear regression  
250 model of  $R_{\text{ox}}$  vs  $C_{\text{CH}_4}$ ; if the AIC of the linear model was lower, no Michaelis-Menten

251 parameters were reported. Cell-specific activities and rates were calculated from reaction  
252 rates based on total mound dry mass, divided by *pmoA* copy numbers and assuming two  
253 gene copies of *pmoA* per cell. Correlations between kinetic parameters ( $k$ ,  $K_m$ ,  $V_{max}$ ), gene  
254 abundance (*pmoA* and 16S), and physical mound parameters (mound porosities, volume,  
255 water content) were tested for significance using linear regression, after transformations  
256 (sqrt for kinetic parameters, log for gene abundances) and removal of outliers as indicated  
257 by diagnostic plots (qq- and Cook's distance).

## 258 **Results and Discussion**

### 259 **Methanotrophic bacteria are in low abundance in termite mounds and associated** 260 **soils**

261 Quantitative PCR was used to estimate the abundance of the methanotroph community  
262 (*pmoA* copy number) and total bacterial community (16S gene copy number) in each  
263 mound and soil sample. Bacterial abundance was consistently high (av.  $2.7 \times 10^{10}$  16S  
264 copy numbers per gram of dry soil; range  $2.5 \times 10^8$  to  $3.4 \times 10^{11}$ ) and did not significantly  
265 differ between sample locations (**Fig. 1b & Fig. S1**); an earlier study found higher  
266 microbial biomass in the mound compared to soil [37], but this may reflect different  
267 methodologies applied to each substrate. In contrast, *pmoA* copy number was relatively  
268 low across the samples (av.  $1.5 \times 10^6$  copies per gram of dry sample material; range:  $2.0$   
269  $\times 10^4$  to  $1.8 \times 10^7$ ) and just 0.0076% that of 16S copy number (range: 0.00018% to  
270 0.048%) (**Figure 1a**). Such values are comparable to those previously reported for the  
271 abundance of *pmoA* genes in upland soils that mediate atmospheric CH<sub>4</sub> oxidation ( $\sim 10^6$   
272 copy number,  $\sim 0.01\%$  relative abundance [38]).

273 Some differences in methanotroph abundance were observed between sample locations  
274 and termite species. Overall, *pmoA* copy number was 3.5-fold higher in mound core and  
275 1.5-fold higher in soil beneath than in surrounding soil, though differences were below the  
276 threshold of significance (**Fig. S1**). In contrast, *pmoA* copy numbers were significantly  
277 lower in mound periphery samples of all species ( $p = 0.028$ ) (**Fig. S1**) and in mound  
278 samples of *T. pastinator* compared to the other two species tested ( $p = 0.028$ ) (**Fig. S2**);  
279 the latter observation is in line with the finding that CH<sub>4</sub> oxidation occurs at low rates in *T.*

280 *pastinator* mound material [7]. Consistently, *pmoA* copy numbers were significantly  
281 positively correlated with the porosity of the mound material, with periphery samples  
282 showing a stronger dependence ( $R^2 = 0.49$ ,  $p = 0.0051$ ) than core ( $R^2 = 0.26$ ,  $p = 0.035$ );  
283 this suggests that denser mound material, as found in mound periphery and *T. pastinator*  
284 mounds, limits methanotroph abundance [19]. These differences may also reflect the  
285 relatively harsh conditions in the mound periphery, with its strong fluctuations of  
286 temperature and water content, compared to the core with termite-engineered  
287 homeostasis [39, 40]. Other physical parameters did not correlate with *pmoA* or 16S copy  
288 numbers.

### 289 **Termite mound methanotroph communities are compositionally distinct from** 290 **those of associated soils**

291 The composition and diversity of the methanotroph community in each sample was  
292 inferred through amplicon sequencing of the *pmoA* gene. Across the samples, 25 OTUs  
293 were detected (**Figure 2**). Observed and estimated richness of these OTUs was higher  
294 in soil samples compared to mound samples (av. Chao1 of 9.0 for mound core, 5.9 for  
295 mound periphery, 12.3 for soil samples;  $p < 0.001$ ) (**Figure 1c**); however, these  
296 differences were driven primarily by rare OTUs in soil samples, with Shannon and inverse  
297 Simpson indices similar between samples (**Figure S3**). Beta diversity of the samples was  
298 analysed by weighted Unifrac and visualised on an nMDS ordination plot (**Figure 3a**).  
299 PERMANOVA analysis confirmed communities significantly differed between sample  
300 locations ( $p = 0.001$ ) and termite species ( $p = 0.022$ ). With respect to sample location,  
301 communities within mound core and periphery samples were similar and were  
302 compositionally distinct from soil communities; in addition, methanotroph communities in  
303 soils beneath mounds were more similar to those within mounds than those in soils  
304 surrounding mounds. This confirms previous inferences that mound and soil communities  
305 are different and shaped by termite activity [14]. In addition, core and peripheral mound  
306 communities significantly clustered by termite species, while soil samples did not; mound  
307 communities of *M. nervosus* and *T. pastinator* were more closely related than those of *M.*  
308 *sunteri* (**Figure 3a**).

309 The 25 OTUs detected were visualised on a phylogenetic tree against reference  
310 sequences from a curated *pmoA* gene database [29]. Phylogenetic analysis indicates that  
311 all OTUs were affiliated with proteobacterial methanotroph sequences (**Figure 2**). Across  
312 all samples, over 80% of the sequences were affiliated with USC $\alpha$ , a recently cultivated  
313 lineage of alphaproteobacterial methanotrophs known to mediate atmospheric CH<sub>4</sub>  
314 oxidation [41, 42] (**Figure 2 & Figure 3b**). The second most dominant taxonomic groups  
315 were affiliated with the alphaproteobacterial lineages *Methylocystis* in mound samples  
316 (<10% relative abundance) and the gammaproteobacterial lineage TUSC in soil samples  
317 (<10% relative abundance). There was a large proportion of shared taxa across the  
318 samples, with the three most abundant OTUs (USC $\alpha$ -affiliated) present in all samples,  
319 regardless of type (mound vs soil), location and termite species (**Figure 3b**). However,  
320 differential abundance analysis supported the observed differences between sample type  
321 and termite species observed by Unifrac analysis (**Figure 3a**). Overall, USC $\alpha$  and  
322 *Methylocystis* OTUs were more abundant in mound core, mound periphery, and soils  
323 beneath, whereas TUSC OTUs were more abundant in surrounding soils. Significant  
324 differential abundance was also observed for certain OTUs between termite species  
325 (**Figure 3b**).

326 It should be noted that community composition of the mounds from the three Australian  
327 termite species strikingly differs from those of the African fungus-growing termite  
328 *Macrotermes falciger* [14]. These African mounds were dominated by the Jasper Ridge 3  
329 cluster (JR3), a gammaproteobacterial methanotroph lineage closely related to USC $\gamma$ ,  
330 which was not detected in the Australian mounds (**Figure 2**). These differences may  
331 reflect the distinct habitat specificity of USC $\gamma$  and USC $\alpha$  methanotrophs. USC $\alpha$  often  
332 occurs in acidic to neutral upland soils ([43], reviewed in [18]), which match the pH values  
333 of 5 measured in the mounds of this study (**Table S1**). In contrast, USC $\gamma$  and associates  
334 lineages are commonly found in upland soils of neutral to basic pH [44, 45], which  
335 corresponds well to pH values of 7 to 8 in *Macrotermes falciger* mounds [14].

### 336 **Methanotroph communities are kinetically adapted to elevated CH<sub>4</sub> concentrations**

337 We determined the kinetics of CH<sub>4</sub> oxidation in the mounds by performing *in situ* GPPTs.  
338 Methane oxidation rate was high across the 29 mounds from all three species

339 investigated (**Figure 4a**). The relationship between CH<sub>4</sub> concentration and reaction rate  
340 best fitted a Michaelis-Menten model for 18 mounds and a linear model for 11 mounds  
341 based on AIC values (**Figure 4a**). For the former group of mounds, apparent Michaelis-  
342 Menten coefficients ( $K_m$ ,  $V_{max}$ ) were calculated. Estimated  $K_m$  values for the 18 mounds  
343 ranged from 0.32 to 47  $\mu\text{mol (L air)}^{-1}$ , and  $V_{max}$  from 8.4 to 280  $\mu\text{mol (L air)}^{-1} \text{ h}^{-1}$ . These  
344 parameters did not significantly differ between termite species. The overall mean values  
345 for  $K_m$  and  $V_{max}$  were  $17.5 \pm 3.5 \mu\text{mol (L air)}^{-1}$  and  $78.3 \pm 17 \mu\text{mol (L air)}^{-1} \text{ h}^{-1}$ , respectively  
346 (standard error of the mean); such values were close to the optimal parameters when  
347 fitting a Michaelis-Menten model to combined GPPT data (excluding mounds with linear  
348 behavior):  $K_m = 13.2 \pm 3.5 \mu\text{mol (L air)}^{-1}$  and  $V_{max} = 55.4 \pm 8.5 \mu\text{mol (L air)}^{-1} \text{ h}^{-1}$  (**Figure**  
349 **4a and 4b**). Thus, the methanotroph communities within termite mounds have an  
350 apparent medium ( $\mu\text{M}$ ) affinity for CH<sub>4</sub>. The apparent  $K_m$  is approximately one to two  
351 orders of magnitude higher than high-affinity (nM) uptake observed in upland soils [46–  
352 48], but one to two orders of magnitude lower than the low-affinity (mM) uptake measured  
353 in landfill-cover soils [49]. Similar Michaelis-Menten values were estimated from GPPTs  
354 in the vadose zone above a contaminated aquifer ( $\sim 1$  to 40  $\mu\text{L L}^{-1}$ ), which featured CH<sub>4</sub>  
355 concentrations in a similar range to termite mounds [35].

356 It is noteworthy that 11 mounds showed an apparent linear increase of reaction rates with  
357 substrate concentrations (**Figure 4a**). This could indicate that  $V_{max}$  has not been reached  
358 during GPPTs with a maximum injected CH<sub>4</sub> concentration of  $\sim 900 \mu\text{L L}^{-1}$  ( $\sim 40 \mu\text{M}$ );  
359 indeed, the injection concentration is in the range of our highest  $K_m$ , thus the capacity of  
360 some mounds to oxidise CH<sub>4</sub> can be substantially higher. A linear increase could also  
361 indicate a shift in kinetics during the course of the GPPT. It is in the nature of the GPPT  
362 that different areas of the mound are exposed to different concentration ranges,  
363 depending on their distance to the gas injection/extraction point [34]. Hence, gas  
364 extracted at different times may have had a “history” of exposure to methanotroph  
365 communities with different kinetics. It is even conceivable that the 1 h long exposure to  
366 high injection concentrations around the injection/extraction point triggered the  
367 upregulation of a low-affinity methane monooxygenase isozyme, such as those reported  
368 in *Methylocystis* sp. SC2 [50].

369 For the 17 selected mounds investigated in more detail, we analysed how the kinetics  
370 and abundance of the methanotroph communities were correlated. While a range of  
371 positive correlations were observed, the most robustly supported was the relationship  
372 between the first-order activity coefficient  $k$  and termite mound core *pmoA* copy number  
373 ( $R^2 = 0.44$ ,  $p = 0.007$ ) (**Figure 4c**). In contrast, correlations with *pmoA* copy number in  
374 periphery and soils were not significant. These observations are in line with previous  
375 inferences that mound cores are primarily responsible for CH<sub>4</sub> oxidation in *M. nervosus*  
376 and *M. sunteri* mounds [7]. On this basis, cell-specific CH<sub>4</sub> reaction rates calculated based  
377 on methanotroph abundance of the mound core ranged from  $1.8 \times 10^{-17}$  to  $1.3 \times 10^{-14}$  mol  
378 CH<sub>4</sub> cell<sup>-1</sup> h<sup>-1</sup>, one to two orders of magnitude higher than observed in upland soils [38].  
379 Though differences between species were not significant, highest cell-specific rates were  
380 calculated for *T. pastinator*, with some values close to a value determined from a landfill-  
381 cover biofilter [51]. This would imply that these methanotroph communities operate close  
382 to their maximum potential of CH<sub>4</sub> oxidation. However, it is likely that values for *T.*  
383 *pastinator* are an overestimate given previous studies indicate that most CH<sub>4</sub> for this  
384 species is oxidised in the soil beneath rather than mound itself [7]; thus, for this species  
385 but not the two others tested, core *pmoA* numbers underestimate the active methanotroph  
386 community involved in mitigating termite CH<sub>4</sub> emissions.

## 387 **Conclusions and perspectives**

388 Overall, our results imply that local environmental concentrations of CH<sub>4</sub> shape the  
389 composition and kinetics of the methanotroph community. Elevated CH<sub>4</sub> production from  
390 termites appears to have selected for a specialised medium-affinity methanotroph  
391 community within mounds. The community analysis shows that the methanotroph  
392 communities within termite mounds are related to, and likely derived from, those of  
393 adjoining soils. However, elevated CH<sub>4</sub> availability and termite activity have facilitated  
394 selection for USC $\alpha$  and *Methylocystis* OTUs, together with exclusion of TUSC OTUs,  
395 compared to adjoining soil. These methanotroph communities, with high cell-specific  
396 reaction rates and medium affinities for CH<sub>4</sub>, are thus ideally kinetically adapted to grow  
397 on termite-derived CH<sub>4</sub> and in turn reduce atmospheric emissions of this greenhouse gas.  
398 Concordant findings were made across three different species, with the strongest

399 relationships between methanotroph abundance and methane oxidation parameters  
400 observed for *M. nervosus* and *M. sunteri* mounds.

401 However, the apparent kinetic parameters of methane oxidation in termite mounds are  
402 atypical of the dominant groups of methanotrophs present. It is probable that USC $\alpha$   
403 mediates most methane oxidation in mounds, given their abundance and prevalence in  
404 the mound core methanotroph communities, as well as the high cell-specific rates of  
405 methane oxidation measured. However, USC $\alpha$  are typically high-affinity methanotrophs  
406 associated with the oxidation of CH<sub>4</sub> at atmospheric concentrations in upland soils. There  
407 are several possible explanations for this discrepancy. Firstly, while members of USC $\alpha$  in  
408 soil and mound share the same methane monooxygenase, the selective pressure of  
409 enhanced methane availability may have caused mound inhabitants to evolve faster-  
410 acting, lower-affinity variants. An alternative explanation is community heterogeneity. Any  
411 apparent Michaelis-Menten parameter estimates from environmental samples are ‘bulk’  
412 values integrating across the whole microbial community and thus a vast array of  
413 potentially different enzymes. Indeed, the observed *in situ* kinetics are also compatible  
414 with the coexistence of slow-acting, high-affinity USC $\alpha$  methanotrophs alongside faster-  
415 acting, low-affinity other groups. While CH<sub>4</sub> concentrations in mounds are elevated  
416 compared to the atmosphere [7, 52], they are generally within an accessible range for  
417 high-affinity methanotrophs (2 – 100 ppmv). *Methylocystis*-like OTUs, as the second most  
418 abundant group, are likely to be particularly competitive at high CH<sub>4</sub> concentrations.  
419 Members of this group encode kinetically distinct methane monooxygenase isozymes [50]  
420 and have been identified in other soils with elevated methane concentrations [22]. They  
421 would therefore have a competitive advantage in termite mounds where CH<sub>4</sub> availability  
422 is elevated and exhibits considerable temporal and spatial variation.

423 However, despite elevated substrate availability, methanotrophs remain minor members  
424 of microbial communities in termite mounds. While they are moderately enriched in  
425 mound core than adjoining soil overall, they are actually diminished relative to soil in both  
426 the mound core of *T. pastinator* and the periphery of all three species. The observed  
427 strong correlation of methanotroph abundance with the porosity of the mound material for  
428 all species strengthens the case for habitat porosity as a crucial factor in regulating the

429 methanotrophic community, likely by regulating local CH<sub>4</sub> availability through diffusion.  
430 Another factor driving low methanotroph abundance could be the accumulation of  
431 ammonia, which is known to be produced in high levels by termites [53]; it is known that  
432 ammonia competitively inhibits methane monooxygenase activity [54, 55] and ammonia  
433 levels are major environmental factors regulating methanotroph community in soils [56,  
434 57]. However, while we detected high ammonia concentrations in some mounds (**Table**  
435 **S1**), this did not correlate with interspecies differences in methanotroph abundance. It is  
436 also possible that the methanotrophs are limited by other factors, such as the  
437 micronutrients required for methane monooxygenase activity. Ultimately, given  
438 methanotrophs remain minor members of the termite mound community, they are only  
439 able to mitigate a proportion of the large amounts of methane produced by mound-  
440 dwelling termites.

## 441 **Acknowledgements**

442 We thank Thanavit Jirapanjawat, Lindsay Hutley and Matthew Northwood for technical  
443 and logistical assistance, and Andreas Brune for an inspiring correspondence. This work  
444 was supported by Australian Research Council grants (DP120101735 and LP100100073  
445 awarded to S.K.A.), Swiss National Science Foundation Early Postdoc Mobility  
446 Fellowships (P2EZP3\_178421 awarded to E.C.; P2EZP3\_155596 awarded to P.A.N.), an  
447 ARC DECRA Fellowship (DE170100310 awarded to C.G.), the Terrestrial Ecosystem  
448 Research Network (TERN) OzFlux, and the TERN Australian SuperSite Network.

449 Author contributions: P.A.N., E.C., S.K.A., and C.G. designed the study. E.C. and P.A.N.  
450 performed field and laboratory work. E.C., P.A.N., and C.G. analyzed data. C.G., E.C.,  
451 P.A.N., and S.K.A. wrote and edited the paper.

## 452 **References**

- 453 1. Brune A. Methanogenesis in the digestive tracts of insects. *Handbook of*  
454 *hydrocarbon and lipid microbiology*. 2010. Springer, pp 707–728.
- 455 2. Zimmerman PR, Greenberg JP, Wandiga SO, Crutzen PJ. Termites: a potentially  
456 large source of atmospheric methane, carbon dioxide, and molecular hydrogen.  
457 *Science (80- )* 1982; **218**: 563–565.
- 458 3. Rasmussen RA, Khalil MAK. Global production of methane by termites. *Nature*



- 459 1983; **301**: 700.
- 460 4. Sugimoto A, Inoue T, Tayasu I, Miller L, Takeichi S, Abe T. Methane and  
461 hydrogen production in a termite-symbiont system. *Ecol Res* 1998; **13**: 241–257.
- 462 5. Brauman A, Kane MD, Labat M, Breznak JA. Genesis of acetate and methane by  
463 gut bacteria of nutritionally diverse termites. *Science (80- )* 1992; **257**: 1384–  
464 1387.
- 465 6. Kirschke S, Bousquet P, Ciais P, Saunois M, Canadell JG, Dlugokencky EJ, et al.  
466 Three decades of global methane sources and sinks. *Nat Geosci* 2013; **6**: 813–  
467 823.
- 468 7. Nauer PA, Hutley LB, Arndt SK. Termite mounds mitigate half of termite methane  
469 emissions. *Proc Natl Acad Sci* 2018; **115**: 13306–13311.
- 470 8. Hanson RS, Hanson TE. Methanotrophic bacteria. *Microbiol Rev* 1996; **60**: 439–  
471 471.
- 472 9. Reuß J, Rachel R, Kämpfer P, Rabenstein A, Küver J, Dröge S, et al. Isolation of  
473 methanotrophic bacteria from termite gut. *Microbiol Res* 2015; **179**: 29–37.
- 474 10. Pester M, Tholen A, Friedrich MW, Brune A. Methane oxidation in termite  
475 hindguts: absence of evidence and evidence of absence. *Appl Environ Microbiol*  
476 2007; **73**: 2024–2028.
- 477 11. Dunfield PF. The Soil Methane Sink. In: Reay D, Hewitt K, Smith K, Grace J  
478 (eds). *Greenhouse Gas Sinks*. 2007. CABI, Wallingford, pp 152–170.
- 479 12. Bignell DE, Eggleton P, Nunes L, Thomas KL. Termites as mediators of carbon  
480 fluxes in tropical forest: budgets for carbon dioxide and methane emissions. *For*  
481 *insects* 1997; 109–134.
- 482 13. Jamali H, Livesley SJ, Grover SP, Dawes TZ, Hutley LB, Cook GD, et al. The  
483 importance of termites to the CH<sub>4</sub> balance of a tropical savanna woodland of  
484 northern Australia. *Ecosystems* 2011; **14**: 698–709.
- 485 14. Ho A, Erens H, Mujinya BB, Boeckx P, Baert G, Schneider B, et al. Termites  
486 facilitate methane oxidation and shape the methanotrophic community. *Appl*  
487 *Environ Microbiol* 2013; **79**: 7234–7240.
- 488 15. Noirot C, Darlington JPEC. Termite nests: architecture, regulation and defence.  
489 *Termites: evolution, sociality, symbioses, ecology*. 2000. Springer, pp 121–139.
- 490 16. Korb J. Termite mound architecture, from function to construction. *Biology of*  
491 *termites: a modern synthesis*. 2010. Springer, pp 349–373.
- 492 17. Jones DT, Eggleton P. Global Biogeography of Termites: A Compilation of  
493 Sources. In: Bignell DE, Roisin Y, Lo N (eds). *Biology of Termites: A Modern*  
494 *Synthesis*. 2011. Springer, Dordrecht, pp 1–576.
- 495 18. Knief C. Diversity and habitat preferences of cultivated and uncultivated aerobic  
496 methanotrophic bacteria evaluated based on *pmoA* as molecular marker. *Front*  
497 *Microbiol* 2015; **6**: 1346.
- 498 19. Nauer PA, Chiri E, Souza D de, Hutley LB, Arndt SK. Rapid image-based field  
499 methods improve the quantification of termite mound structures and greenhouse-

- 500 gas fluxes. *Biogeosciences* 2018; **15**: 3731–3742.
- 501 20. Holmes AJ, Costello A, Lidstrom ME, Murrell JC. Evidence that participate  
502 methane monooxygenase and ammonia monooxygenase may be evolutionarily  
503 related. *FEMS Microbiol Lett* 1995; **132**: 203–208.
- 504 21. Costello AM, Lidstrom ME. Molecular characterization of functional and  
505 phylogenetic genes from natural populations of methanotrophs in lake sediments.  
506 *Appl Environ Microbiol* 1999; **65**: 5066–5074.
- 507 22. Henneberger R, Chiri E, Bodelier PEL, Frenzel P, Lüke C, Schroth MH. Field-  
508 scale tracking of active methane-oxidizing communities in a landfill cover soil  
509 reveals spatial and seasonal variability. *Environ Microbiol* 2015; **17**: 1721–1737.
- 510 23. Caporaso JG, Lauber CL, Walters WA, Berg-Lyons D, Lozupone CA, Turnbaugh  
511 PJ, et al. Global patterns of 16S rRNA diversity at a depth of millions of  
512 sequences per sample. *Proc Natl Acad Sci* 2011; **108**: 4516–4522.
- 513 24. Parada AE, Needham DM, Fuhrman JA. Every base matters: assessing small  
514 subunit rRNA primers for marine microbiomes with mock communities, time series  
515 and global field samples. *Environ Microbiol* 2016; **18**: 1403–1414.
- 516 25. Apprill A, McNally S, Parsons R, Weber L. Minor revision to V4 region SSU rRNA  
517 806R gene primer greatly increases detection of SAR11 bacterioplankton. *Aquat  
518 Microb Ecol* 2015; **75**: 129–137.
- 519 26. Chiri E, Nauer PA, Rainer E-M, Zeyer J, Schroth MH. High temporal and spatial  
520 variability of atmospheric-methane oxidation in Alpine glacier-forefield soils. *Appl  
521 Environ Microbiol* 2017; **83**: e01139-17.
- 522 27. Edgar RC. Search and clustering orders of magnitude faster than BLAST.  
523 *Bioinformatics* 2010; **26**: 2460–2461.
- 524 28. Wen X, Yang S, Liebner S. Evaluation and update of cutoff values for  
525 methanotrophic pmoA gene sequences. *Arch Microbiol* 2016; **198**: 629–636.
- 526 29. Dumont MG, Lüke C, Deng Y, Frenzel P. Classification of pmoA amplicon  
527 pyrosequences using BLAST and the lowest common ancestor method in  
528 MEGAN. *Front Microbiol* 2014; **5**: 34.
- 529 30. McMurdie PJ, Holmes S. phyloseq: an R package for reproducible interactive  
530 analysis and graphics of microbiome census data. *PLoS One* 2013; **8**: e61217.
- 531 31. Urmann K, Gonzalez-Gil G, Schroth MH, Hofer M, Zeyer J. New field method:  
532 Gas push– pull test for the in-situ quantification of microbial activities in the  
533 vadose zone. *Environ Sci Technol* 2005; **39**: 304–310.
- 534 32. Reim A, Lüke C, Krause S, Pratscher J, Frenzel P. One millimetre makes the  
535 difference: high-resolution analysis of methane-oxidizing bacteria and their  
536 specific activity at the oxic–anoxic interface in a flooded paddy soil. *ISME J* 2012;  
537 **6**: 2128.
- 538 33. Raj SS, Sumangala RK, Lal KB, Panicker PK. Gas chromatographic analysis of  
539 oxygen and argon at room temperature. *J Chromatogr Sci* 1996; **34**: 465–467.
- 540 34. Schroth MH, Istok JD. Models to determine first-order rate coefficients from

- 541 single-well push-pull tests. *Groundwater* 2006; **44**: 275–283.
- 542 35. Urmann K, Schroth MH, Noll M, Gonzalez-Gil G, Zeyer J. Assessment of  
543 microbial methane oxidation above a petroleum-contaminated aquifer using a  
544 combination of in situ techniques. *J Geophys Res Biogeosciences* 2008; **113**.
- 545 36. R Development Core Team. R: A Language and Environment for Statistical  
546 Computing. 2017. R Foundation for Statistical Computing, Vienna, Austria.
- 547 37. Holt JA. Microbial activity in the mounds of some Australian termites. *Appl Soil*  
548 *Ecol* 1998; **9**: 183–187.
- 549 38. Kolb S, Knief C, Dunfield PF, Conrad R. Abundance and activity of uncultured  
550 methanotrophic bacteria involved in the consumption of atmospheric methane in  
551 two forest soils. *Environ Microbiol* 2005; **7**: 1150–1161.
- 552 39. King H, Ocko S, Mahadevan L. Termite mounds harness diurnal temperature  
553 oscillations for ventilation. *Proc Natl Acad Sci* 2015; **112**: 11589–11593.
- 554 40. Bristow KL, Holt JA. Can termites create local energy sinks to regulate mound  
555 temperature? *J Therm Biol* 1987; **12**: 19–21.
- 556 41. Tveit AT, Hestnes AG, Robinson SL, Schintlmeister A, Dedysh SN, Jehmlich N, et  
557 al. Widespread soil bacterium that oxidizes atmospheric methane. *Proc Natl Acad*  
558 *Sci* 2019; 201817812.
- 559 42. Pratscher J, Vollmers J, Wiegand S, Dumont MG, Kaster A-K. Unravelling the  
560 identity, metabolic potential and global biogeography of the atmospheric methane-  
561 oxidizing Upland Soil Cluster  $\alpha$ . *Environ Microbiol* 2018; **20**: 1016–1029.
- 562 43. Knief C, Lipski A, Dunfield PF. Diversity and activity of methanotrophic bacteria in  
563 different upland soils. *Appl Environ Microbiol* 2003; **69**: 6703–6714.
- 564 44. Chiri E, Nauer PA, Henneberger R, Zeyer J, Schroth MH. Soil–methane sink  
565 increases with soil age in forefields of Alpine glaciers. *Soil Biol Biochem* 2015; **84**:  
566 83–95.
- 567 45. Angel R, Conrad R. In situ measurement of methane fluxes and analysis of  
568 transcribed particulate methane monooxygenase in desert soils. *Environ Microbiol*  
569 2009; **11**: 2598–2610.
- 570 46. Bender M, Conrad R. Kinetics of CH<sub>4</sub> oxidation in oxic soils exposed to ambient  
571 air or high CH<sub>4</sub> mixing ratios. *FEMS Microbiol Lett* 1992; **101**: 261–270.
- 572 47. Nauer PA, Schroth MH. In situ quantification of atmospheric methane oxidation in  
573 near-surface soils. *Vadose Zo J* 2010; **9**: 1052–1062.
- 574 48. Judd CR, Koyama A, Simmons MP, Brewer P, von Fischer JC. Co-variation in  
575 methanotroph community composition and activity in three temperate grassland  
576 soils. *Soil Biol Biochem* 2016; **95**: 78–86.
- 577 49. Schroth MH, Eugster W, Gómez KE, Gonzalez-Gil G, Niklaus PA, Oester P.  
578 Above-and below-ground methane fluxes and methanotrophic activity in a landfill-  
579 cover soil. *Waste Manag* 2012; **32**: 879–889.
- 580 50. Baani M, Liesack W. Two isozymes of particulate methane monooxygenase with  
581 different methane oxidation kinetics are found in *Methylocystis* sp. strain SC2.

- 582 *Proc Natl Acad Sci* 2008; **105**: 10203–10208.
- 583 51. Gebert J, Stralis-Pavese N, Alawi M, Bodrossy L. Analysis of methanotrophic  
584 communities in landfill biofilters using diagnostic microarray. *Environ Microbiol*  
585 2008; **10**: 1175–1188.
- 586 52. Jamali H, Livesley SJ, Hutley LB, Fest B, Arndt SK. The relationships between  
587 termite mound CH<sub>4</sub>/CO<sub>2</sub> emissions and internal concentration ratios are species  
588 specific. *Biogeosciences* 2013; **10**: 2229–2240.
- 589 53. Rong JI, Brune A. Nitrogen mineralization, ammonia accumulation, and emission  
590 of gaseous NH<sub>3</sub> by soil-feeding termites. *Biogeochemistry* 2006; **78**: 267–283.
- 591 54. Schnell S, King GM. Mechanistic analysis of ammonium inhibition of atmospheric  
592 methane consumption in forest soils. *Appl Environ Microbiol* 1994; **60**: 3514–  
593 3521.
- 594 55. Carlsen HN, Joergensen L, Degn H. Inhibition by ammonia of methane utilization  
595 in *Methylococcus capsulatus* (Bath). *Appl Microbiol Biotechnol* 1991; **35**: 124–  
596 127.
- 597 56. Bodelier PLE, Laanbroek HJ. Nitrogen as a regulatory factor of methane oxidation  
598 in soils and sediments. *Fems Microbiol Ecol* 2004; **47**: 265–277.
- 599 57. Veraart AJ, Steenbergh AK, Ho A, Kim SY, Bodelier PLE. Beyond nitrogen: The  
600 importance of phosphorus for CH<sub>4</sub> oxidation in soils and sediments.  
601 *Geoderma* 2015; **259–260**.

602

603

## 604 **Figures**

605 **Figure 1.** Abundance and richness of methane-oxidising bacteria (methanotrophs) in the  
606 mounds and adjoining soils. a) Abundance of the methanotroph community, based on  
607 copy number of the *pmoA* gene encoding the particulate methane monooxygenase 27  
608 kDa subunit gene as determined by qPCR. b) Abundance of the total bacterial and  
609 archaeal community, based on copy number of the universal 16S rRNA gene (V4 region)  
610 as determined by qPCR. c) Estimated richness of the methanotroph community, based  
611 on Chao1 index of the *pmoA* gene as determined by amplicon sequencing. Mound  
612 samples (core and periphery) and adjoining soil samples (surrounding and beneath) were  
613 tested from mounds of three different termite species (*Microcerotermes nervosus*, Mn;  
614 *Macroglyphotermes sunteri*, Ms; *Tumulitermes pastinator*, Tp). The box plots show  
615 minimum, lower quartile, median, upper quartile, and maximum values, with all individual  
616 values shown. Different letters denote significant differences between sample groups ( $p$   
617  $< 0.05$ , Wilcoxon signed-rank test).

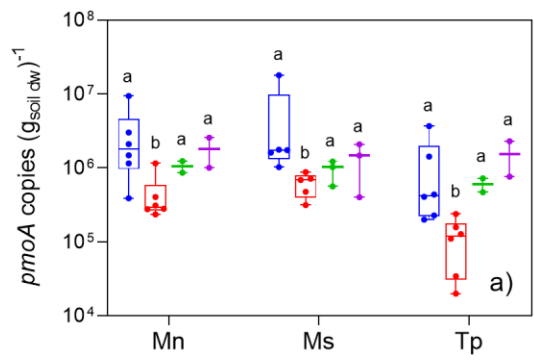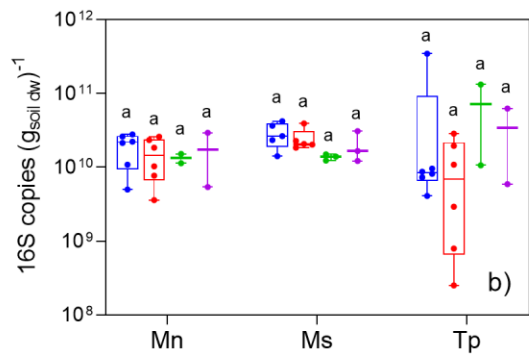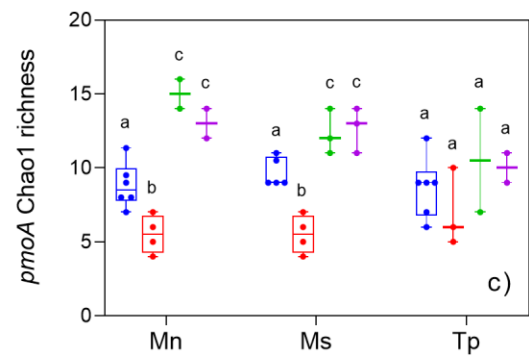

□ Mound core   
 □ Mound periphery   
 □ Soil surrounding   
 □ Soil beneath

618

619 **Figure 2.** Maximum-likelihood tree showing the phylogenetic affiliation of the protein-  
620 derived *pmoA* gene sequences of 25 Operational Taxonomic Units (OTUs), in relation to  
621 uncultivated methanotrophic clusters and methanotroph isolates. The tree was built using  
622 the LG empirical amino acid substitution model and bootstrapped using 100 bootstrap  
623 replicates. Node numbers indicate bootstrap branch support  $\geq 60$ . OTUs retrieved in this  
624 study are displayed in bold. Genebank accession numbers for the sequences at individual  
625 node tips are given in parentheses. The scale bar displays 0.2 changes per amino acid  
626 position.

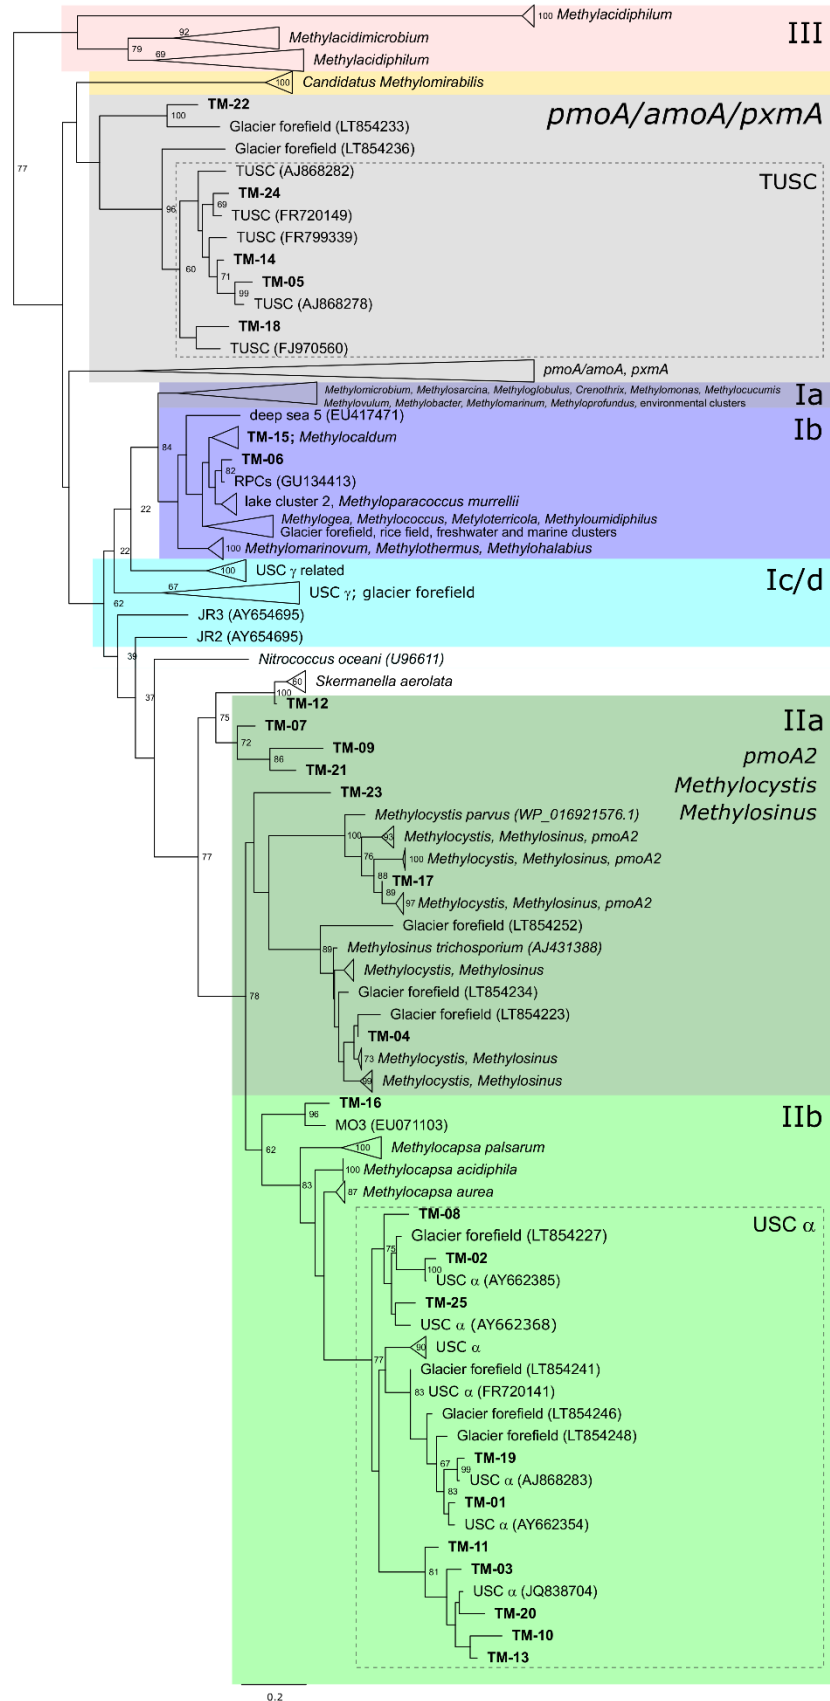



628 **Figure 3.** Community composition of methane-oxidising bacteria (methanotrophs) of  
629 mounds and adjoining soils. a) The non-metric multidimensional scaling (nMDS)  
630 ordination shows the methanotrophic community structure (beta diversity) measured by  
631 weighted UniFrac distance metric of the *pmoA* gene. The plot further differentiates the  
632 methanotroph communities according to termite species and sample location. b)  
633 Heatmap showing the relative abundance of the *pmoA* OTUs in all samples. OTUs are  
634 ordered according to their position on the phylogenetic tree shown in Figure 3. Differential  
635 abundance of *pmoA* OTUs between sample groups was assessed from negative binomial  
636 models of the OTU read counts; *p* values were corrected with the false discovery rate  
637 approach to account for multiple testing. Only significant tests are shown.

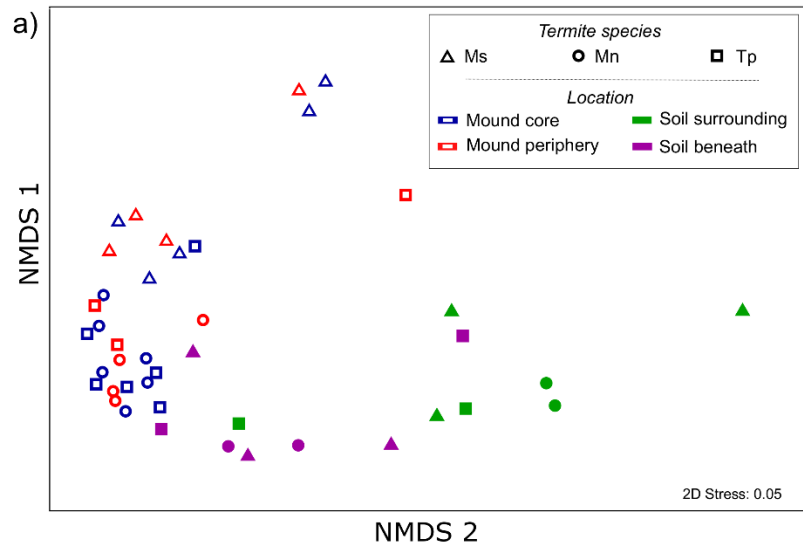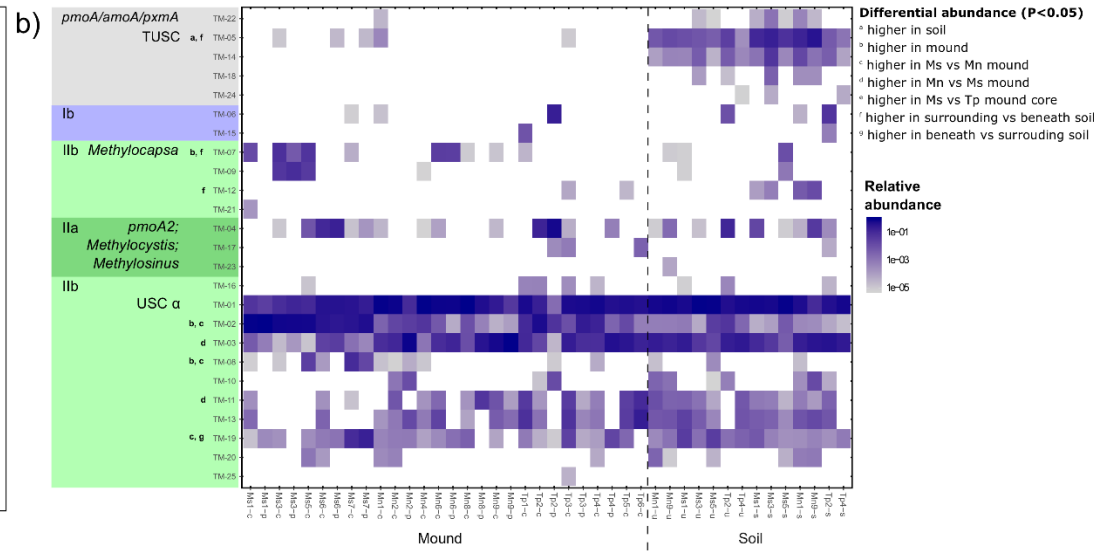

639 **Figure 4.** *In situ* kinetic parameters of methane oxidation in termite mounds. a) Optimal  
640 Michaelis-Menten (M-M) curve estimated for a combined data set of *in situ* concentrations  
641 and reaction rates from 18 out of 29 mounds showing M-M behavior, excluding 11  
642 mounds with an apparent linear increase of rates based on AIC. b) Individual M-M  
643 parameters of the 18 mounds showing M-M behavior, including their mean and standard  
644 error, and the optimal M-M parameters of the combined data set. c) Positive correlation  
645 of activity coefficients  $k$  with *pmoA* gene abundance in mound core samples of the 17  
646 mounds selected for detailed analysis ( $R^2 = 0.44$ ,  $p = 0.0069$ ). Two outliers have been  
647 removed, indicated with red X.

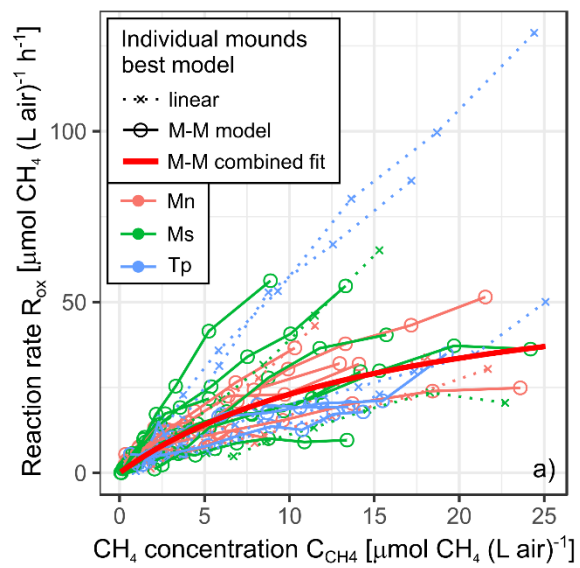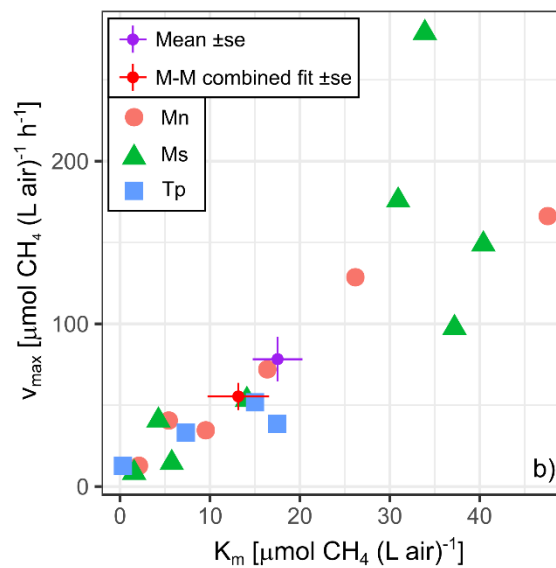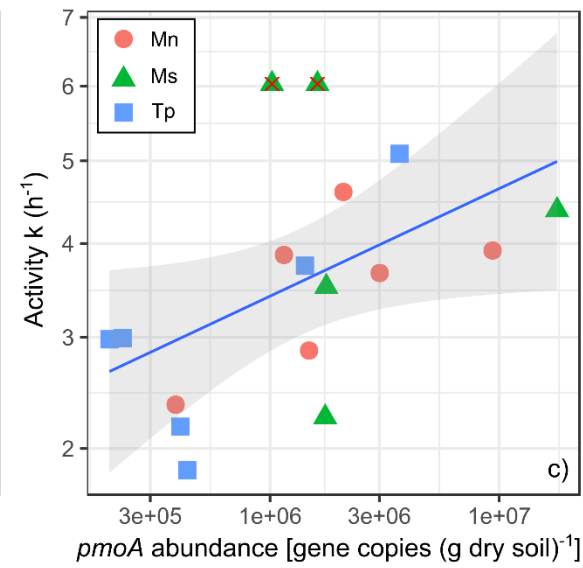

648

649
